# Supplementary material for: High-resolution X-ray phase-contrast tomography of human placenta with different wavefront markers
Source: Springer Nature journal article supplement (doi:10.1038/s41598-025-85105-z), 2025-01-16
Supplement: MOESM1 [file 41598_2025_85105_MOESM1_ESM.pdf]

# Supplementary Figures

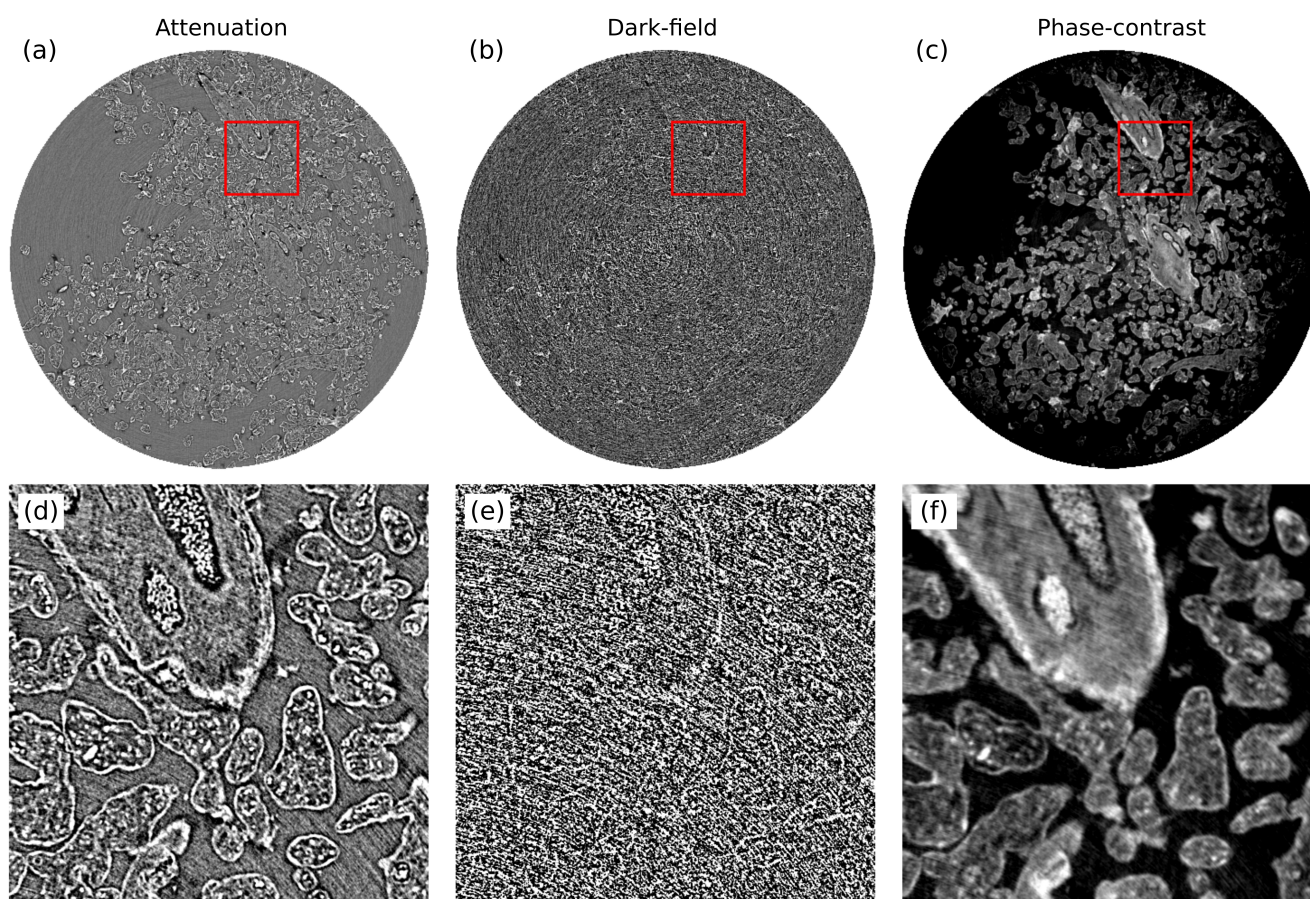

**Figure S1.** Comparison of the three different signals obtained for MBI with sandpaper. **(a)** Attenuation, **(b)** dark-field and **(c)** phase-contrast reconstructions of the same slice are shown, along with corresponding zoomed ROIs **(d)**-(**f**). The dark-field signal for this sample was significantly affected by noise, making it challenging to discern any structural details.
